# Supplementary material
Source: publisher figshare collection journal article supplement (https://tandf.figshare.com/articles/dataset/_/14609615)
Supplement: Supplementary file 1 [file 1]

**Supplementary Material 2.** Composition of the polyphenols in the methanolic extract of *Borassus flabellifer* Linn., analyzed by LC-MS

| RT   | m/z ratio | Compound               |
|------|-----------|------------------------|
| 1.28 | 139       | 4-hydroxy benzoic acid |
| 1.98 | 165       | p- Coumaric acid       |
| 2.19 | 155       | Protocatechuic acid    |
| 2.91 | 193       | Ferulic acid           |
| 3.38 | 181       | Caffeic acid           |
| 6.15 | 291       | Catechin               |
| 9.90 | 303       | Quercetin              |

(RT- Retention Time; m/z ratio- mass to charge ratio) (Data reused with permission number 5024120077151, Dated March 8, 2021)
