# Supplementary material
Source: publisher figshare collection journal article supplement (https://tandf.figshare.com/articles/dataset/_/14609615)
Supplement: Supplementary file 2 [file 1]

**Supplementary Material 1.** The details of primer sequence of different genes used in apoptosis detection and the house keeping gene  $\beta$ -actin

| Gene           | Direction | Sequence                       |
|----------------|-----------|--------------------------------|
| Caspase-3      | Forward   | 5'-GTGGAAGTACGATGATATGGC-3'    |
|                | Reverse   | 5'-CGCAAAGTGACTGGATGAACC-3'    |
| Caspase-7      | Forward   | 5'-GGACCGAGTGCCCACTTATC-3'     |
|                | Reverse   | 5'-TCGCTTTGTCTGAAGTTCTTGTT-3'  |
| Apaf-1         | Forward   | 5'-CTGGCAACGGGAGATGACAATGG-3'  |
|                | Reverse   | 5'-AGCGGAGCACACAAATGAAGAAGC-3' |
| Nrf-2          | Forward   | 5'-CACAGTGCTCCTATGCGTGA-3'     |
|                | Reverse   | 5'-TTCTGGGCGGCGACTTTAT T-3'    |
| HO-1           | Forward   | 5'-GGTGATGGCCTCCTTGTACC-3'     |
|                | Reverse   | 5'-GTGG GGCATAGACTGGGTTC-3'    |
| $\beta$ -actin | Forward   | 5'-AAGATCCTGACCGAGCGTGG-3'     |
|                | Reverse   | 5'-CAGCACTGTGTTGGCATAGAGG-3'   |
